# Supplementary material for: Seven-gene biomarkers reveal prognostic and immune signatures in lung adenocarcinoma
Source: Research Square preprint supplement (doi:10.21203/rs.3.rs-7512386/v1), 2025-11-12
Supplement: Supplementary file 1 [file c14e5780c065a51734521ff1.xlsx]

## Sheet: Sheet1
Supplementary Table 1 Gene Ontology and pathway enrichment analysis of common DEGs in LUAD
Category	Term	Description	Count	%	P-Value
BP	GO:0001525	angiogenesis	7	10.4478	0.000157608
BP	GO:0031623	receptor internalization	4	5.97015	0.000627772
BP	GO:0042310	vasoconstriction	3	4.47761	0.00168376
BP	GO:0098869	cellular oxidant detoxification	4	5.97015	0.00189038
BP	GO:0001666	response to hypoxia	5	7.46269	0.00249017
BP	GO:0098609	cell-cell adhesion	5	7.46269	0.00346831
BP	GO:0042744	hydrogen peroxide catabolic process	3	4.47761	0.00365331
BP	GO:0009617	response to bacterium	4	5.97015	0.00578738
BP	GO:0051591	response to cAMP	3	4.47761	0.00631822
BP	GO:0007155	cell adhesion	7	10.4478	0.0084698
BP	GO:1904646	cellular response to beta-amyloid	3	4.47761	0.00923831
BP	GO:0048286	lung alveolus development	3	4.47761	0.00963837
BP	GO:0030198	extracellular matrix organization	4	5.97015	0.0141559
BP	GO:0001570	vasculogenesis	3	4.47761	0.0175627
BP	GO:0009611	response to wounding	3	4.47761	0.0186282
BP	GO:0007166	cell surface receptor signaling pathway	5	7.46269	0.0204472
BP	GO:0006898	receptor-mediated endocytosis	3	4.47761	0.0208389
BP	GO:0030336	negative regulation of cell migration	4	5.97015	0.0221155
BP	GO:0060426	lung vasculature development	2	2.98507	0.0254744
BP	GO:0046322	negative regulation of fatty acid oxidation	2	2.98507	0.0254744
BP	GO:0042045	epithelial fluid transport	2	2.98507	0.0254744
BP	GO:0001763	morphogenesis of a branching structure	2	2.98507	0.0286134
BP	GO:0032355	response to estradiol	3	4.47761	0.0287257
BP	GO:0048484	enteric nervous system development	2	2.98507	0.037971
BP	GO:0045471	response to ethanol	3	4.47761	0.0435343
BP	GO:1900272	negative regulation of long-term synaptic potentiation	2	2.98507	0.0441601
BP	GO:0006954	inflammatory response	5	7.46269	0.045278
BP	GO:0071375	cellular response to peptide hormone stimulus	2	2.98507	0.0472399
CC	GO:0005581	collagen trimer	6	8.95522	1.05874e-05
CC	GO:0005886	plasma membrane	34	50.7463	1.40437e-05
CC	GO:0005576	extracellular region	19	28.3582	7.83772e-05
CC	GO:0009986	cell surface	10	14.9254	0.000164651
CC	GO:0043235	receptor complex	6	8.95522	0.000510639
CC	GO:0016324	apical plasma membrane	7	10.4478	0.00156625
CC	GO:0009897	external side of plasma membrane	7	10.4478	0.00166737
CC	GO:0005615	extracellular space	15	22.3881	0.00215219
CC	GO:0005925	focal adhesion	6	8.95522	0.0107352
CC	GO:0016020	membrane	26	38.806	0.0266228
CC	GO:0045121	membrane raft	4	5.97015	0.0275485
CC	GO:0035579	specific granule membrane	3	4.47761	0.0328257
MF	GO:0042802	identical protein binding	14	20.8955	0.00314063
MF	GO:0044877	macromolecular complex binding	5	7.46269	0.0223488
MF	GO:0038023	signaling receptor activity	4	5.97015	0.0289984
MF	GO:0001540	beta-amyloid binding	3	4.47761	0.0322179
MF	GO:0005509	calcium ion binding	7	10.4478	0.032882
MF	GO:0050998	nitric-oxide synthase binding	2	2.98507	0.0349753
KEGG	hsa03320	PPAR signaling pathway	4	12.5	0.0175058
